# Supplementary material for: Growth hormone receptor antagonism downregulates ATP-binding cassette transporters contributing to improved drug efficacy against melanoma and hepatocarcinoma in vivo
Source: PubMed Central journal article supplement (PMC9296106; doi:10.3389/fonc.2022.936145), 2022-07-05
Supplement: DataSheet_1.pdf [file DataSheet_1.pdf]

# Supplementary Figure 1

## Treated B16-F10 melanoma cells

time point: 15min

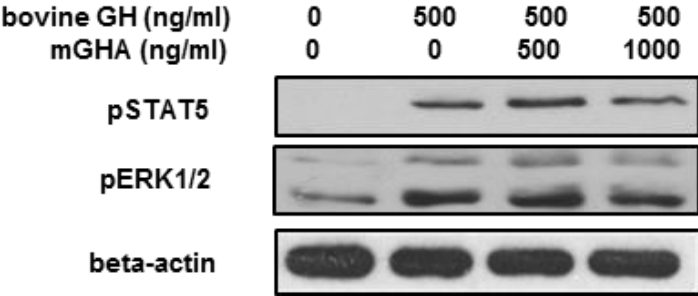

**Sup-Fig-1:** Mouse melanoma cells B16-F10 were treated with either PBS (control) or bovine GH (500 ng/mL) or both bGH and mouse GHR antagonist (mGHA, @ 500 or 1000 ng/mL) for 15-mins. Following treatment, protein was collected, quantified and western-blot was performed for phosphorylated-STAT5 or phosphorylated-ERK1/2 and beta-Actin.

## Supplementary Figure 2

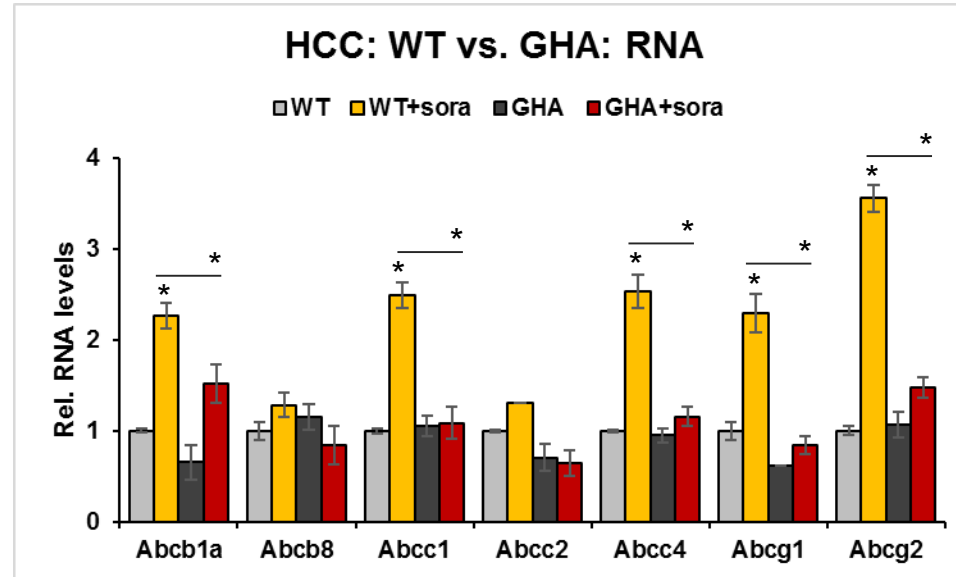

**Sup-Fig-2:** Mouse HCC cells Hepa1-6 allografts in WT or GHA mice and treated with either PBS or sorafenib, were dissected at the end of study, RNA extracted, and RNA expression of target genes were quantified by RT-qPCR. (\*,  $p < 0.05$ ,  $n = 3$ )

# Supplementary Figure 3

### HepG2 – doxorubicin – EC50 [cell viability]

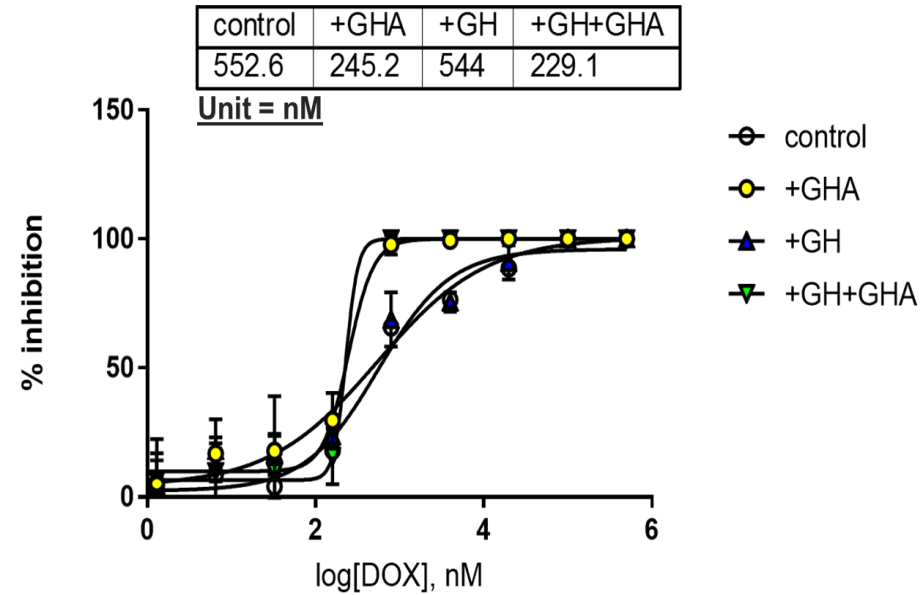

**Sup-Fig-3:** Human liver cancer cells Hep-G2 were treated with either saline (control) or GH (2.5nM) or GHR antagonist (GHA, @ 500nM) or both GH and GHA along with different doses of chemotherapy doxorubicin for 72-hrs. Cell viability was quantified using Resazurin cell viability assay (as described in Methods section) and EC50 was calculated using GraphPad Prism.

# Supplementary Figure 4

**Sup-Fig-4:** Mouse body-weights across treatments. (A) WT and GHA mice with B16-F10 allografts and treated with saline or cisplatin (Main Fig 2). (B) WT and GHKO mice with B16-F10 allografts and treated with saline or cisplatin (Main Fig 3).

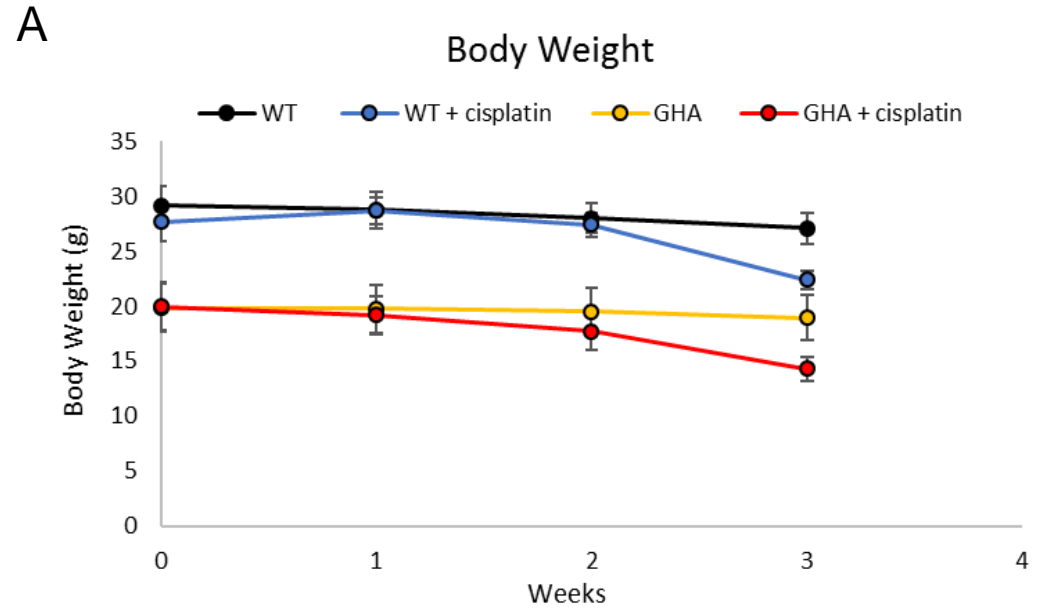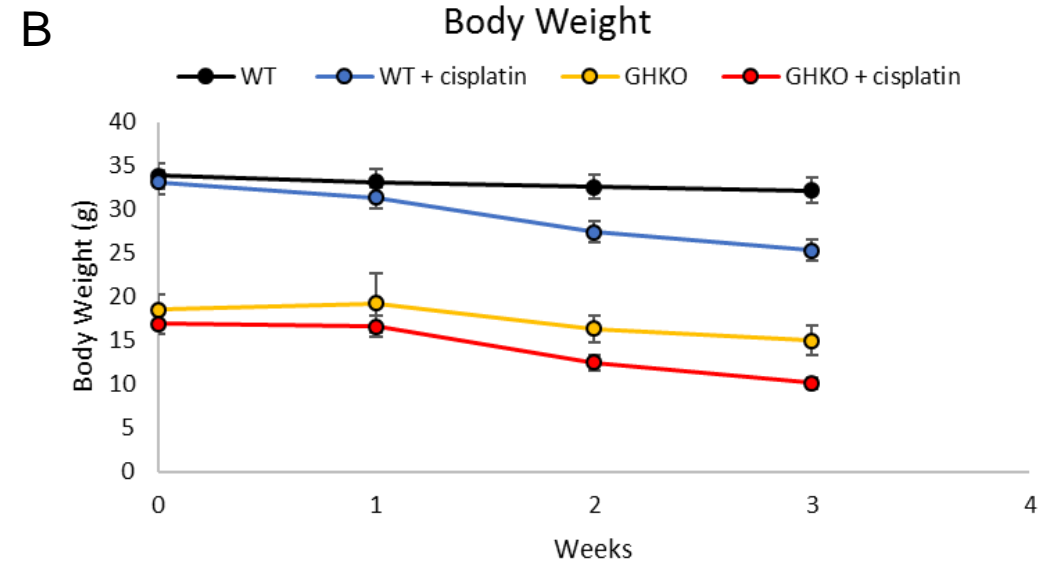

## Supplementary Figure 5

### Primer sequences for RT-qPCR.

| Gene          | Full name                                             | Forward(5'→3')          | Reverse(5'→3')          |
|---------------|-------------------------------------------------------|-------------------------|-------------------------|
| <i>Ghr</i>    | Mouse growth hormone receptor                         | GCCTGGGGACAAGTTCTTCTGGA | TGCAGCTTGTCGTTGGCTTTCCC |
| <i>Igf-1</i>  | Mouse insulin like growth factor 1                    | GACAAACAAGAAAACGAAGC    | ATTTGGTAGGTGTTTCGATG    |
| <i>Igf-1r</i> | Mouse insulin like growth factor 1 receptor           | AGAACCGAATCATCATAACG    | TTTTAAATGGTGCCTCCTTG    |
| <i>Abcb1a</i> | ATP Binding Cassette Subfamily B Member 1A            | AGGACAAAAGAAGGAACTTG    | GATAAGGAGAAAAGCTGCAC    |
| <i>Abcb8</i>  | ATP Binding Cassette Subfamily B Member 8             | GCTGTAAAGCAGAAGAAGCTG   | CCAAGACCATACAGTTGAAAG   |
| <i>Abcc1</i>  | ATP Binding Cassette Subfamily C Member 1             | GTCTATCGTAAGGCTCTTTTG   | GACCAGATCATGTTAATGTACG  |
| <i>Abcc2</i>  | ATP Binding Cassette Subfamily C Member 2             | CGTATATAAGAAGGCACTAACC  | CAATCTGTAAAACACTGGACC   |
| <i>Abcc4</i>  | ATP Binding Cassette Subfamily C Member 4             | AAACAAAGTCATCCTGTTCCG   | CAGAAAGTTCTTGATCCTCC    |
| <i>Abcg1</i>  | ATP Binding Cassette Subfamily G Member 1             | CCAGCTTTATGTCCTAAGTC    | CACTTCCATGACAAAGTCTG    |
| <i>Abcg2</i>  | ATP Binding Cassette Subfamily G Member 2             | AAGAGCCAGTCTATGTTACC    | AACTCCAGCTCTATTTTGC     |
| <i>B2m</i>    | Beta-2 microglobulin                                  | CTGGTCTTTCTATATCCTGGCT  | CATGTCTCGATCCCAGTAGAC   |
| <i>Eif3f</i>  | Eukaryotic translation initiation factor 3, subunit F | TACGAACGCCGCAACGAGGG    | TGGCACCGAAAAGCAGTTGGTGA |
| <i>Hprt</i>   | Hypoxanthine phosphoribosyltransferase 1              | ATCAGTCAACGGGGGACATA    | AGAGGTCCTTTTCACCAGCA    |

# Original Western-blot Images

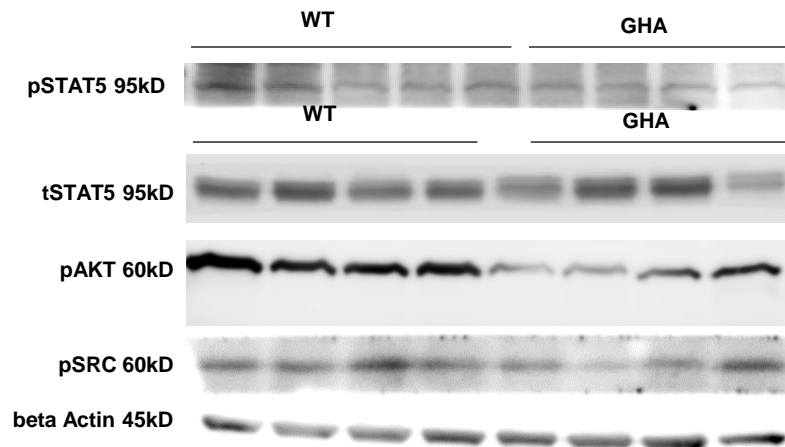

Main Figure 1

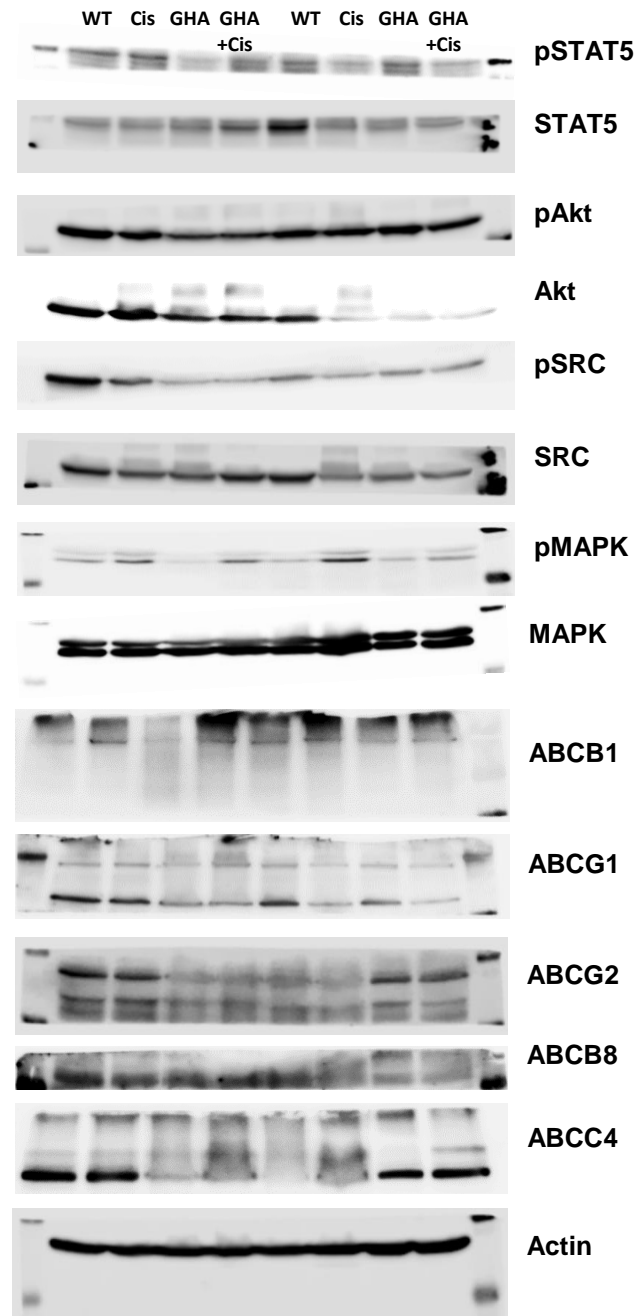

Main Figure 2

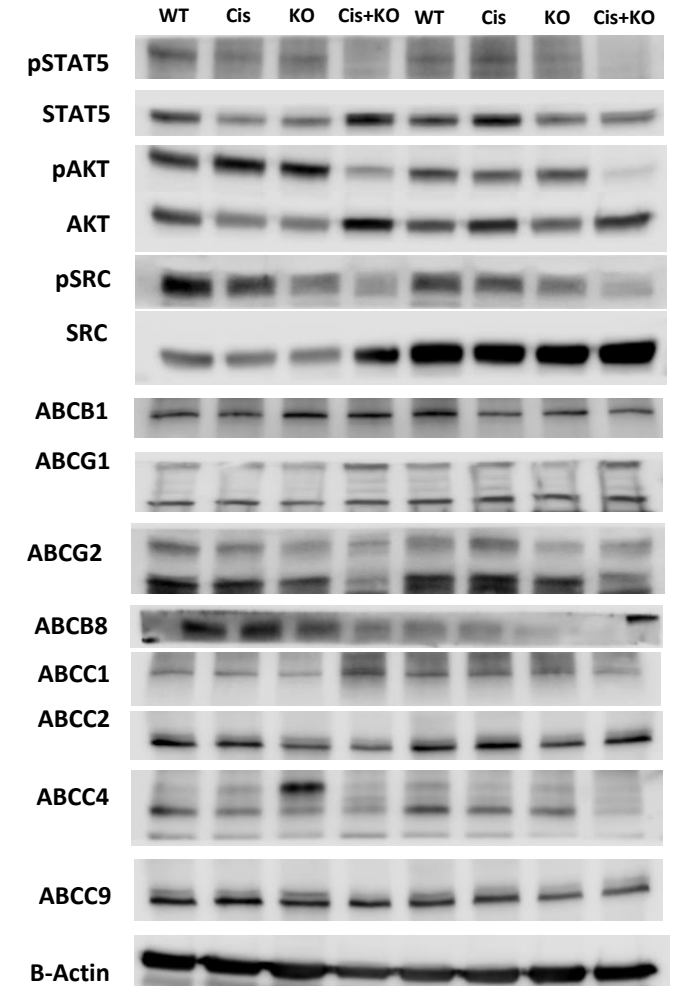

Main Figure 3
